# Supplementary material for: Prognostic Impact of Mitral Regurgitation Before and After Transcatheter Aortic Valve Replacement in Patients With Severe Low‐Flow, Low‐Gradient Aortic Stenosis
Source: PubMed Central journal article supplement — J Am Heart Assoc. 2023 Aug 30;12(17):e029553. doi: 10.1161/JAHA.123.029553 (PMC10547324; doi:10.1161/jaha.123.029553), 2023-08-30
Supplement: JAH3-12-e029553-s001.pdf [file JAH3-12-e029553-s001.pdf]

# **SUPPLEMENTAL MATERIAL**

**Table S1. VARC-3 definition of bleeding and transfusions**

| Overt bleeding that fulfils one of the following criteria*:                                                                                                                                                                                                                                                                                                                                                                                                                                                                                                                                                                                                                                                                                                                                                                                                                                                                                                                                                                              |
|------------------------------------------------------------------------------------------------------------------------------------------------------------------------------------------------------------------------------------------------------------------------------------------------------------------------------------------------------------------------------------------------------------------------------------------------------------------------------------------------------------------------------------------------------------------------------------------------------------------------------------------------------------------------------------------------------------------------------------------------------------------------------------------------------------------------------------------------------------------------------------------------------------------------------------------------------------------------------------------------------------------------------------------|
| Type 1                                                                                                                                                                                                                                                                                                                                                                                                                                                                                                                                                                                                                                                                                                                                                                                                                                                                                                                                                                                                                                   |
| <ul style="list-style-type: none"><li>• Overt bleeding that does not require surgical or percutaneous intervention, but does require medical intervention by a health care professional, leading to hospitalization, an increased level of care, or medical evaluation (BARC 2)</li><li>• Overt bleeding that requires a transfusion of 1 unit of whole blood/red blood cells (BARC 3a)</li></ul>                                                                                                                                                                                                                                                                                                                                                                                                                                                                                                                                                                                                                                        |
| Type 2                                                                                                                                                                                                                                                                                                                                                                                                                                                                                                                                                                                                                                                                                                                                                                                                                                                                                                                                                                                                                                   |
| <ul style="list-style-type: none"><li>• Overt bleeding that requires a transfusion of 2–4 units of whole blood/red blood cells (BARC 3a)</li><li>• Overt bleeding associated with a haemoglobin drop of &gt;3 g/dL (&gt;1.86 mmol/L) but &lt;5 g/d (&lt;3.1 mmol/L) (BARC 3a)</li></ul>                                                                                                                                                                                                                                                                                                                                                                                                                                                                                                                                                                                                                                                                                                                                                  |
| Type 3                                                                                                                                                                                                                                                                                                                                                                                                                                                                                                                                                                                                                                                                                                                                                                                                                                                                                                                                                                                                                                   |
| <ul style="list-style-type: none"><li>• Overt bleeding in a critical organ, such as intracranial, intraspinal, intraocular, pericardial (associated with haemodynamic compromise/tamponade and necessitating intervention), or intramuscular with compartment syndrome (BARC 3b, BARC 3c)</li><li>• Overt bleeding causing hypovolemic shock or severe hypotension (systolic blood pressure &lt;90 mmHg lasting &gt;30 min and not responding to volume resuscitation) or requiring vasopressors or surgery (BARC 3b)</li><li>• Overt bleeding requiring reoperation, surgical exploration, or reintervention for the purpose of controlling bleeding (BARC 3b, BARC 4)</li><li>• Post-thoracotomy chest tube output <math>\geq 2</math> L within a 24-h period (BARC 4)</li><li>• Overt bleeding requiring a transfusion of <math>\geq 5</math> units of whole blood/red blood cells (BARC 3a)</li><li>• Overt bleeding associated with a haemoglobin drop <math>\geq 5</math> g/dL (<math>\geq 3.1</math> mmol/L) (BARC 3b).</li></ul> |
| Type 4                                                                                                                                                                                                                                                                                                                                                                                                                                                                                                                                                                                                                                                                                                                                                                                                                                                                                                                                                                                                                                   |
| Overt bleeding leading to death. Should be classified as:                                                                                                                                                                                                                                                                                                                                                                                                                                                                                                                                                                                                                                                                                                                                                                                                                                                                                                                                                                                |
| <ul style="list-style-type: none"><li>• Probable: Clinical suspicion (BARC 5a)</li><li>• Definite: Confirmed by autopsy or imaging (BARC 5b)</li></ul>                                                                                                                                                                                                                                                                                                                                                                                                                                                                                                                                                                                                                                                                                                                                                                                                                                                                                   |

\*Overt bleeding is defined as any clinically obvious source of bleeding or bleeding source identified after appropriate investigation and diagnostic testing (e.g. imaging). Any procedural blood loss should be considered overt bleeding.

BARC, Bleeding Academic Research Consortium

**Table S2. Rate of missing values**

|                                       | <b>All<br/>(N = 268)</b> |
|---------------------------------------|--------------------------|
| Age                                   | 0                        |
| Sex male                              | 0                        |
| BSA                                   | 0                        |
| Diabetes                              | 0                        |
| Hypertension                          | 0                        |
| Hypercholesterolemia                  | 0                        |
| Smoking                               | 81 (30.2)                |
| COPD                                  | 0                        |
| eGFR                                  | 0                        |
| CAD                                   | 0                        |
| Prior MI                              | 0                        |
| Prior PCI                             | 0                        |
| Prior CABG                            | 0                        |
| Prior stroke/TIA                      | 0                        |
| Peripheral arteriopathy               | 47 (17.5)                |
| Atrial fibrillation/flutter           | 0                        |
| Pacemaker                             | 0                        |
| ICD/CRTD                              | 0                        |
| COPD                                  | 0                        |
| EuroSCORE II                          | 0                        |
| NYHA                                  | 0                        |
| <b>Baseline echocardiography</b>      |                          |
| LVEF                                  | 0                        |
| Average AVG                           | 0                        |
| Aortic valve area                     | 0                        |
| Aortic valve area index               | 0                        |
| Paradoxical LFLG                      | 0                        |
| Classical LFLG                        | 0                        |
| Moderate-to-severe AR                 | 0                        |
| BAV                                   | 0                        |
| sPAP                                  | 0                        |
| Right ventricular dysfunction         | 45 (16.8)                |
| <b>Procedural features</b>            |                          |
| Transfemoral approach                 | 0                        |
| Pacing                                | 0                        |
| Predilatation                         | 0                        |
| Balloon-expandable prosthesis         | 0                        |
| Self-expandable prosthesis            | 0                        |
| Prosthesis size <23 mm                | 0                        |
| Postdilatation                        | 1 (0.4%)                 |
| <b>Pre-discharge echocardiography</b> |                          |
| LVEF                                  | 0                        |
| Average AVG                           | 0                        |

|                                |   |
|--------------------------------|---|
| Residual moderate-to-severe AR | 0 |
| sPAP                           | 0 |

The rate of missing values is reported as N (%).

AVG, aortic valve gradient; AR, aortic regurgitation; BAV, bicuspid aortic valve; BSA, body surface area; CABG, coronary artery bypass graft surgery; CCS, chronic coronary syndrome; COPD, chronic obstructive pulmonary disease; CRT-D, Cardiac resynchronization therapy-defibrillator; eGFR, Estimated Glomerular Filtration Rate; EuroSCORE, European system for cardiac operative risk evaluation; ICD, Implantable cardioverter-defibrillator; LVEF, Left ventricular ejection fraction; MI, myocardial infarction; NYHA, New York Heart Association functional class; PCI, percutaneous coronary intervention; sPAP, Systolic pulmonary artery pressure; TIA, transient ischemic attack.

**Table S3. Medications at admission**

|                                    | <b>Overall<br/>(N=268)</b> | <b>MR ≤ 2+<br/>(N= 211)</b> | <b>MR &gt; 2+<br/>(N=57)</b> | <b>P value</b> |
|------------------------------------|----------------------------|-----------------------------|------------------------------|----------------|
| ACEi, N (%)                        | 85 (31.7)                  | 66 (31.3)                   | 19 (33.3)                    | 0.751          |
| ARB, N (%)                         | 41 (15.3)                  | 32 (15.2)                   | 9 (15.8)                     | 1.000          |
| ACEi/ARB, N (%)                    | 126 (47)                   | 98 (46.4)                   | 28 (49.1)                    | 0.766          |
| Dihydropyridine CCB, N (%)         | 37 (13.8)                  | 30 (14.2)                   | 7 (12.3)                     | 0.830          |
| Diuretic, N (%)                    | 190 (70.9)                 | 144 (68.2)                  | 46 (80.7)                    | 0.072          |
| β-blocker, N (%)                   | 84 (31.3)                  | 63 (29.9)                   | 21 (36.8)                    | 0.336          |
| Aspirin, N (%)                     | 169 (63.1)                 | 133 (63)                    | 36 (63.2)                    | 1.000          |
| P2Y <sub>12</sub> inhibitor, N (%) | 90 (33.6)                  | 73 (34.6)                   | 17 (29.8)                    | 0.531          |
| VKA, N (%)                         | 23 (8.6)                   | 17 (8.1)                    | 6 (10.5)                     | 0.595          |
| DOAC, N (%)                        | 56 (20.9)                  | 44 (20.9)                   | 12 (21.1)                    | 1.000          |
| Statin, N (%)                      | 161 (60.1)                 | 121 (57.3)                  | 40 (70.2)                    | 0.094          |

ACEi, Angiotensin-converting enzyme inhibitor; ARB, Angiotensin receptor blocker; calcium-channel blocker, CCB; VKA, Vitamin K antagonist; DOAC, Direct acting Oral Anticoagulant.

**Table S4. Medications at discharge**

|                                    | <b>Overall<br/>(N=266)</b> | <b>MR ≤ 2+<br/>(N= 210)</b> | <b>MR &gt; 2+<br/>(N=56)</b> | <b>P value</b> |
|------------------------------------|----------------------------|-----------------------------|------------------------------|----------------|
| ACEi, N (%)                        | 75 (28.2)                  | 52 (24.8)                   | 23 (41.1)                    | 0.020          |
| ARB, N (%)                         | 48 (18)                    | 31 (14.8)                   | 17 (30.4)                    | 0.011          |
| ACEi/ARB, N (%)                    | 123 (46.2)                 | 83 (39.5)                   | 40 (71.4)                    | <0.001         |
| Dihydropyridine CCB, N (%)         | 61 (22.9)                  | 50 (23.8)                   | 11 (19.6)                    | 0.594          |
| Diuretic, N (%)                    | 225 (84.6)                 | 175 (83.3)                  | 50 (89.3)                    | 0.404          |
| β-blocker, N (%)                   | 96 (36.1)                  | 74 (35.2)                   | 22 (39.3)                    | 0.639          |
| Aspirin, N (%)                     | 210 (78.9)                 | 167 (79.5)                  | 43 (76.8)                    | 0.713          |
| P2Y <sub>12</sub> inhibitor, N (%) | 165 (62)                   | 134 (63.8)                  | 31 (55.4)                    | 0.279          |
| VKA, N (%)                         | 19 (7.1)                   | 15 (7.1)                    | 4 (7.1)                      | 1.000          |
| DOAC, N (%)                        | 59 (22.2)                  | 46 (21.9)                   | 13 (23.2)                    | 0.857          |
| Statin, N (%)                      | 164 (61.7)                 | 126 (60)                    | 38 (67.9)                    | 0.354          |

ACEi, Angiotensin-converting enzyme inhibitor; ARB, Angiotensin receptor blocker; calcium-channel blocker, CCB; VKA, Vitamin K antagonist; DOAC, Direct acting Oral Anticoagulant.

**Table S5. Adverse events at one year according to baseline MR severity**

|                             | <b>All<br/>(N = 268)</b> | <b>MR≤2+<br/>(N = 211)</b> | <b>MR&gt;2+<br/>(N = 57)</b> | <b><i>P</i></b> |
|-----------------------------|--------------------------|----------------------------|------------------------------|-----------------|
| Primary outcome*, N (%)     | 55 (20.5)                | 23 (10.9)                  | 32 (56.1)                    | <0.001          |
| All-cause death, N (%)      | 29 (10.8)                | 10 (4.7)                   | 19 (33.3)                    | <0.001          |
| Cardiac death, N (%)        | 21 (7.8)                 | 5 (2.4)                    | 16 (28.1)                    | <0.001          |
| Non-cardiac death, N (%)    | 6 (3.0)                  | 5 (2.4)                    | 3 (5.3)                      | 0.373           |
| HF rehospitalization, N (%) | 34 (12.7)                | 13 (6.2)                   | 21 (36.8)                    | <0.001          |

HF, heart failure; MR, mitral regurgitation. \* Composite of all-cause death and HF rehospitalization.

**Table S6. Baseline demographic and clinical features according to MR improvement.**

|                                                          | <b>MR not improved<br/>(N = 32)</b> | <b>MR improved<br/>(N = 24)</b> | <b><i>P</i></b> |
|----------------------------------------------------------|-------------------------------------|---------------------------------|-----------------|
| Age, years                                               | 82 (78-87)                          | 83 (78-85)                      | 0.708           |
| Sex female, N (%)                                        | 18 (56.3)                           | 12 (50.0)                       | 0.788           |
| BSA, m <sup>2</sup>                                      | 1.7±0.1                             | 1.7±0.1                         | 0.999           |
| Diabetes, N (%)                                          | 10 (31.3)                           | 7 (29.2)                        | 1.000           |
| Hypertension, N (%)                                      | 30 (93.8)                           | 23 (95.8)                       | 1.000           |
| Hypercholesterolemia, N (%)                              | 28 (87.5)                           | 17 (70.8)                       | 0.176           |
| Smoking, N (%)                                           | 1 (4.8)                             | 1 (5.3)                         | 1.000           |
| COPD, N (%)                                              | 9 (28.1)                            | 7 (29.2)                        | 1.000           |
| eGFR, mL/min                                             | 56 (41-68)                          | 69 (42-85)                      | 0.685           |
| CCS, N (%)                                               | 15 (46.9)                           | 8 (33.3)                        | 0.412           |
| Prior MI, N (%)                                          | 4 (12.5)                            | 3 (12.5)                        | 1.000           |
| Prior PCI, N (%)                                         | 15 (46.9)                           | 6 (25.0)                        | 0.162           |
| Prior CABG, N (%)                                        | 4 (12.5)                            | 3 (12.5)                        | 1.000           |
| Prior stroke/TIA, N (%)                                  | 1 (3.1)                             | 0 (0)                           | 1.000           |
| Peripheral arteriopathy, N (%)                           | 9 (37.5)                            | 5 (23.8)                        | 0.356           |
| Atrial fibrillation/flutter, N (%)                       | 11 (34.4)                           | 9 (37.5)                        | 1.000           |
| Pacemaker, N (%)                                         | 5 (15.6)                            | 2 (8.3)                         | 0.686           |
| ICD/CRT-D, N (%)                                         | 1 (3.1)                             | 4 (16.7)                        | 0.153           |
| EuroSCORE II, %                                          | 4.4 (3.0-8.0)                       | 8.0 (4.0-12.0)                  | 0.071           |
| NYHA I, N (%)                                            | 0 (0.0)                             | 0 (0)                           |                 |
| NYHA II, N (%)                                           | 11 (34.4)                           | 8 (33.3)                        | 0.447           |
| NYHA III, N (%)                                          | 19 (59.4)                           | 12 (50.0)                       |                 |
| NYHA IV, N (%)                                           | 2 (6.3)                             | 4 (16.7)                        |                 |
| LVEF, %,                                                 | 43 (36-55)                          | 35 (30-57)                      | 0.659           |
| Average AVG, mmHg                                        | 33 (26-37)                          | 30 (24-33)                      | 0.153           |
| Aortic valve area, cm <sup>2</sup>                       | 0.6±0.1                             | 0.6±0.2                         | 0.401           |
| Aortic valve area index, cm <sup>2</sup> /m <sup>2</sup> | 0.3±0.1                             | 0.4±0.1                         | 0.535           |
| Paradoxical LFLG, N (%)                                  | 14 (43.8)                           | 10 (41.7)                       | 1.000           |
| Classical LFLG, N (%)                                    | 18 (56.3)                           | 14 (58.3)                       | 1.000           |
| Moderate-to-severe AR, N (%)                             | 1 (3.1)                             | 3 (12.5)                        | 0.303           |
| BAV, N (%)                                               | 1 (3.1)                             | 0 (0.0)                         | 1.000           |
| sPAP, mmHg                                               | 50 (43-60)                          | 40 (32-55)                      | 0.126           |
| Right Ventricular dysfunction, N (%)                     | 12 (42.9)                           | 7 (33.3)                        | 0.564           |
| Transfemoral approach, N (%)                             | 27 (84.4)                           | 24 (100.0)                      | 0.064           |
| Pacing, N (%)                                            | 29 (90.6)                           | 20 (83.3)                       | 0.447           |
| Predilatation, N (%)                                     | 16 (50.0)                           | 7 (29.2)                        | 0.171           |
| Balloon-expandable prosthesis, N (%)                     | 5 (15.6)                            | 10 (41.7)                       | 0.037           |
| Self-expandable prosthesis, N (%)                        | 27 (84.4)                           | 14 (58.3)                       | 0.037           |
| Prosthesis size <23 mm, N (%)                            | 4 (12.5)                            | 4 (16.7)                        | 0.713           |
| Postdilatation, N (%)                                    | 6 (18.8)                            | 5 (20.8)                        | 1.000           |
| LVEF, %,                                                 | 48 (36-55)                          | 49 (34-57)                      | 0.861           |
| Average AVG, mmHg                                        | 6 (4-8)                             | 6 (5-9)                         | 0.113           |



|                                       |            |            |       |
|---------------------------------------|------------|------------|-------|
| Residual moderate-to-severe AR, N (%) | 0 (0.0)    | 0 (0.0)    | 1.000 |
| sPAP, mmHg                            | 50 (40-65) | 40 (35-50) | 0.147 |

Continuous normally distributed variables are expressed as mean  $\pm$  SD. Categorical variables are expressed as N (%). Continuous non-normally distributed variables are expressed as median (interquartile range).

AVG, aortic valve gradient; AR, aortic regurgitation; BAV, bicuspid aortic valve; BSA, body surface area; CABG, coronary artery bypass graft surgery; CCS, chronic coronary syndrome; COPD, chronic obstructive pulmonary disease; CRT-D, Cardiac resynchronization therapy-defibrillator; eGFR, Estimated Glomerular Filtration Rate; EuroSCORE II, European system for cardiac operative risk evaluation; ICD, Implantable cardioverter-defibrillator; LVEF, Left ventricular ejection fraction; MI, myocardial infarction; NYHA, New York Heart Association functional class; PCI, percutaneous coronary intervention; sPAP, Systolic pulmonary artery pressure; TIA, transient ischemic attack.

**Table S7. Adverse events at one year in patients with MR>2+ with or without improvement after TAVR**

|                             | <b>All<br/>(N = 56)</b> | <b>MR not<br/>improved<br/>(N = 32)</b> | <b>MR improved<br/>(N = 24)</b> | <b><i>P</i></b> |
|-----------------------------|-------------------------|-----------------------------------------|---------------------------------|-----------------|
| Primary outcome*, N (%)     | 31 (55.4)               | 22 (68.8)                               | 9 (37.5)                        | 0.030           |
| All-cause death, N (%)      | 18 (32.1)               | 14 (43.8)                               | 4 (16.7)                        | 0.044           |
| Cardiac death, N (%)        | 15 (26.8)               | 12 (37.5)                               | 3 (12.5)                        | 0.065           |
| Non-cardiac death, N (%)    | 3 (5.4)                 | 2 (6.3)                                 | 1(4.2)                          | 1.000           |
| HF rehospitalization, N (%) | 21 (37.5)               | 16 (50.0)                               | 5 (20.8)                        | 0.030           |

HF, heart failure; MR, mitral regurgitation. \*Composite of all-cause death and HF rehospitalization.

**Figure S1. Covariate balance for baseline MR severity before and after weighting**

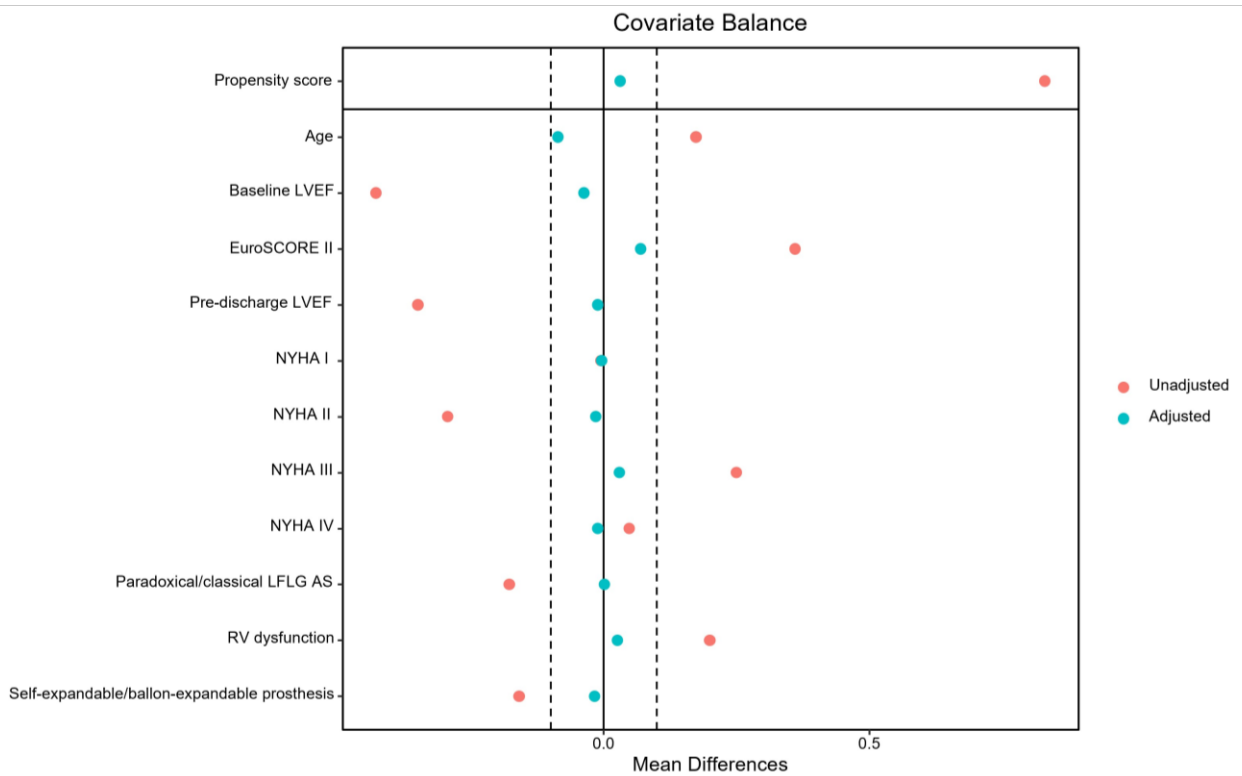

Love plot showing the unadjusted (red circles) and adjusted (blue circles) values of the mean difference before and after weighting. The dotted line represents the threshold value of 0.1, conventionally considered an index of optimal balance achieved after weighting.

EuroSCORE II, European system for cardiac operative risk evaluation; LFLG-AS, low flow low gradient aortic stenosis; LVEF, left ventricular ejection fraction; NYHA, New York Heart Association functional class; RV, right ventricular.

**Figure S2. Study selection process**

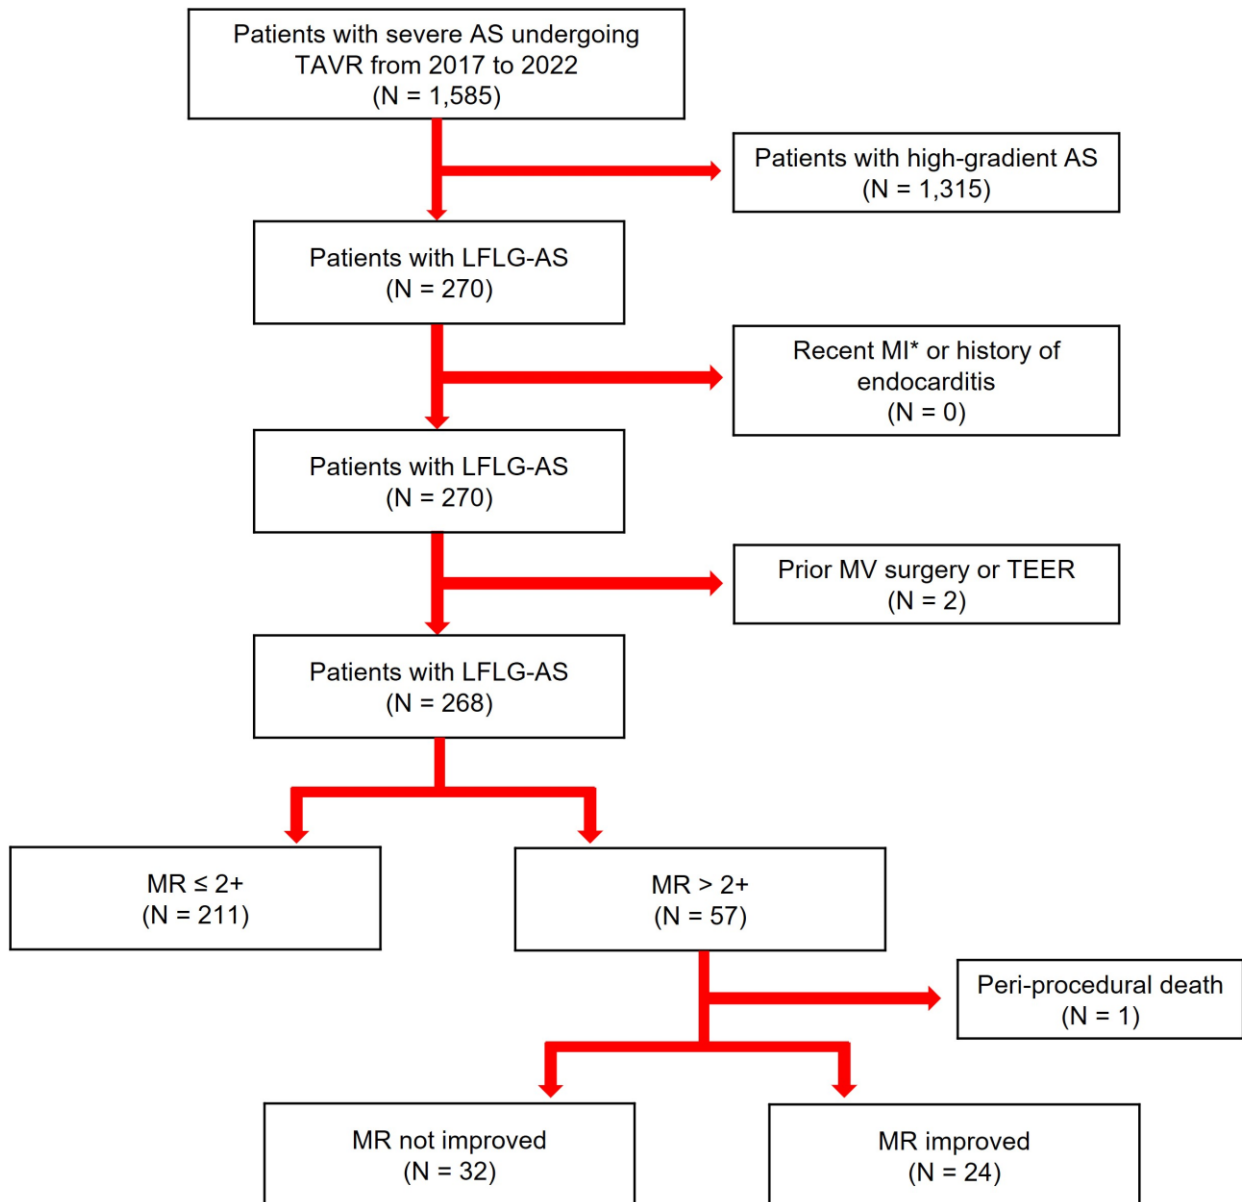

AS, aortic stenosis; LFLG-AS, low flow, low gradient aortic stenosis; MI, myocardial infarction; MR, mitral regurgitation; MV, mitral valve; TEER, transcatheter edge-to-edge repair.

\* Defined as MI occurred within 90 days from the TAVR procedure.

**Figure S3. Survival free from the primary outcome according to baseline MR severity in patients with paradoxical (panel A) or classical (panel B) LFLG-AS forms**

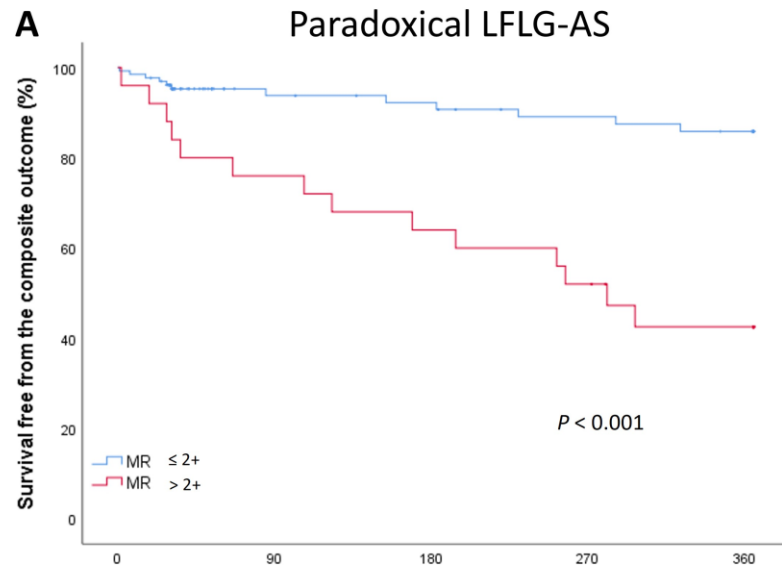

| N at risk |     | Time (days) |    |     |     |        | N at risk |    |
|-----------|-----|-------------|----|-----|-----|--------|-----------|----|
|           |     | 0           | 90 | 180 | 270 | 360    |           |    |
| MR ≤2+    | 130 | 63          | 59 | 54  | 50  | MR ≤2+ | 81        | 45 |
| MR >2+    | 25  | 18          | 15 | 12  | 8   | MR >2+ | 32        | 26 |

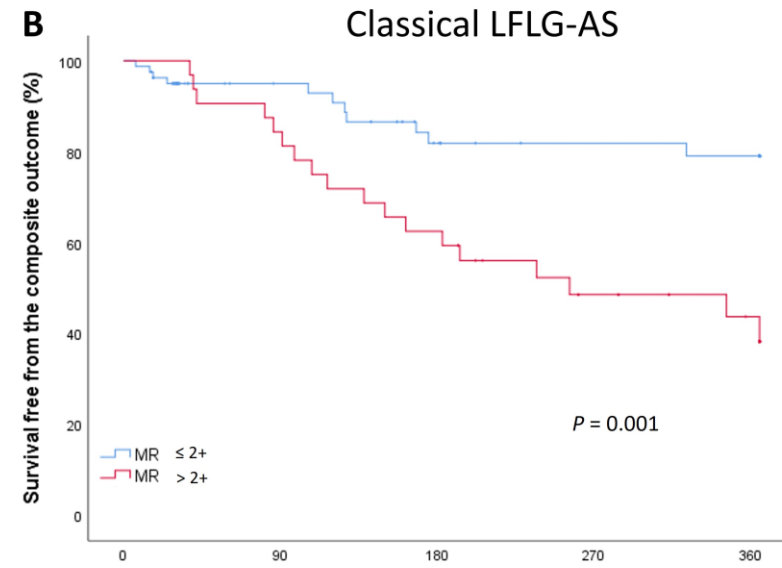

| N at risk |    | Time (days) |    |     |     |        | N at risk |    |
|-----------|----|-------------|----|-----|-----|--------|-----------|----|
|           |    | 0           | 90 | 180 | 270 | 360    |           |    |
| MR ≤2+    | 81 | 45          | 33 | 28  | 27  | MR ≤2+ | 81        | 45 |
| MR >2+    | 32 | 26          | 19 | 12  | 7   | MR >2+ | 32        | 26 |

LFLG-AS, low flow, low gradient aortic stenosis; MR, mitral regurgitation.

**Figure S4. Survival free from the primary outcome (panel A), all-cause death (B), and HF hospitalization (C) in patients with MR 0/1+, 2+ and >2+**

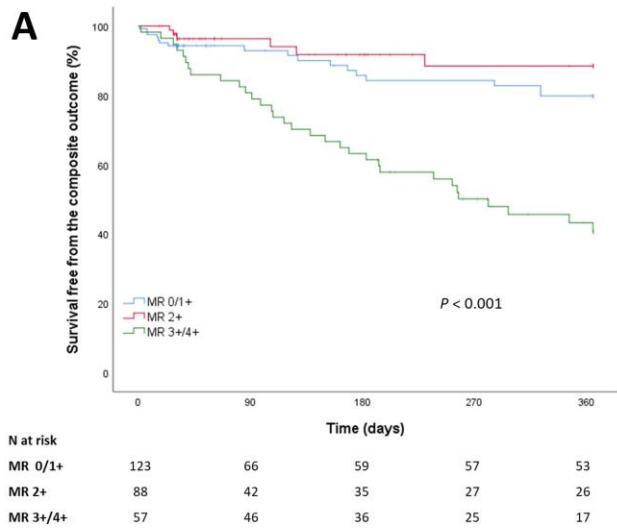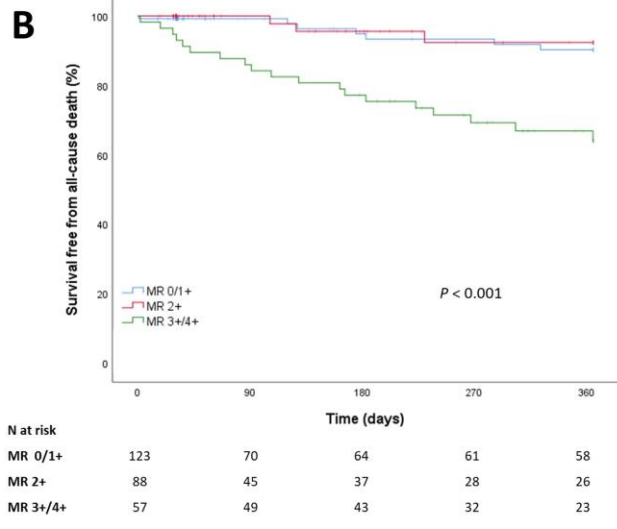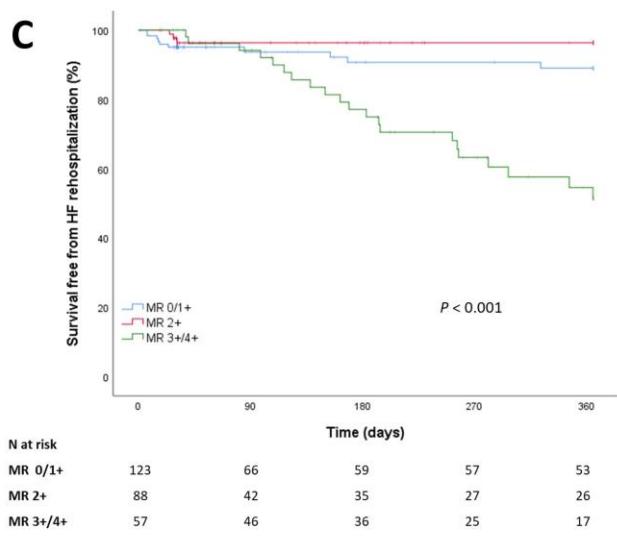

HF, heart failure; MR, mitral regurgitation.

**Figure S5. Landmark analysis for HF hospitalization in patients with MR  $\leq 2+$  vs. those with MR  $> 2+$**

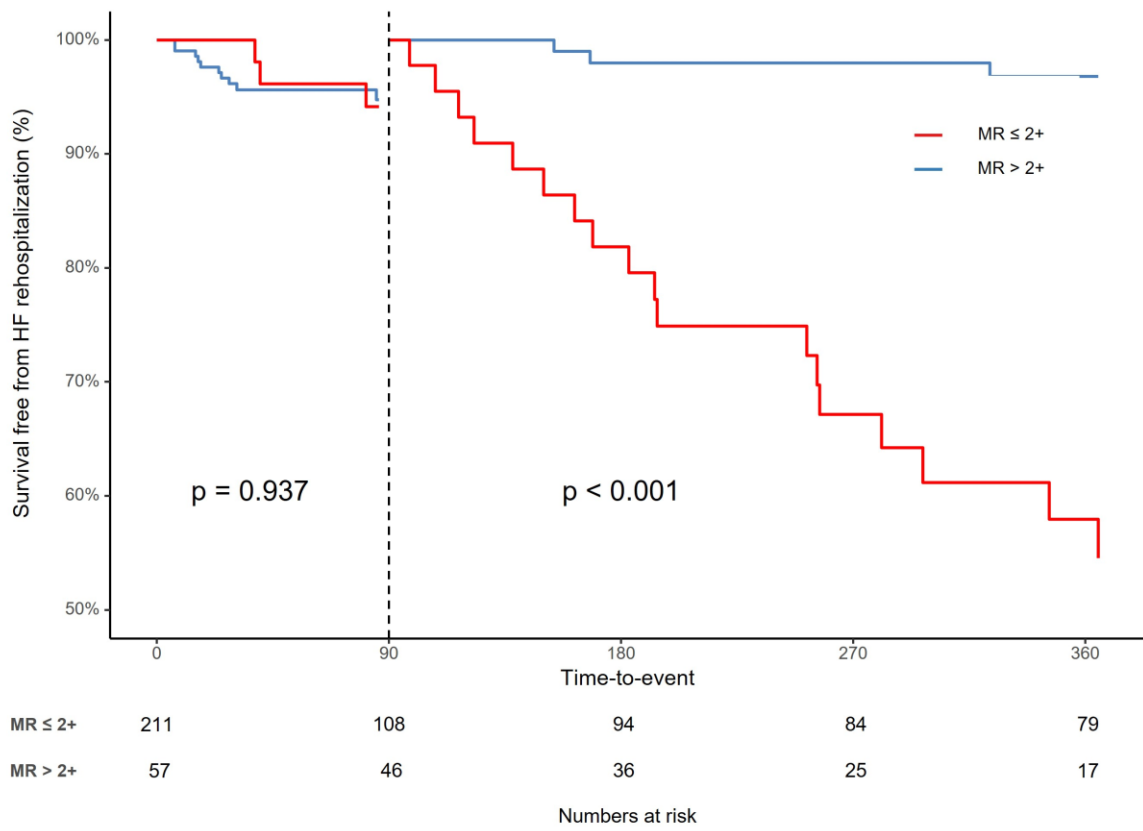

HF, heart failure; MR, mitral regurgitation.

**Figure S6. Cause-specific risk curves for HF hospitalization (solid curves) and competing risk of death (dotted curves) in patients with MR  $\leq 2+$  vs. those with MR  $> 2+$**

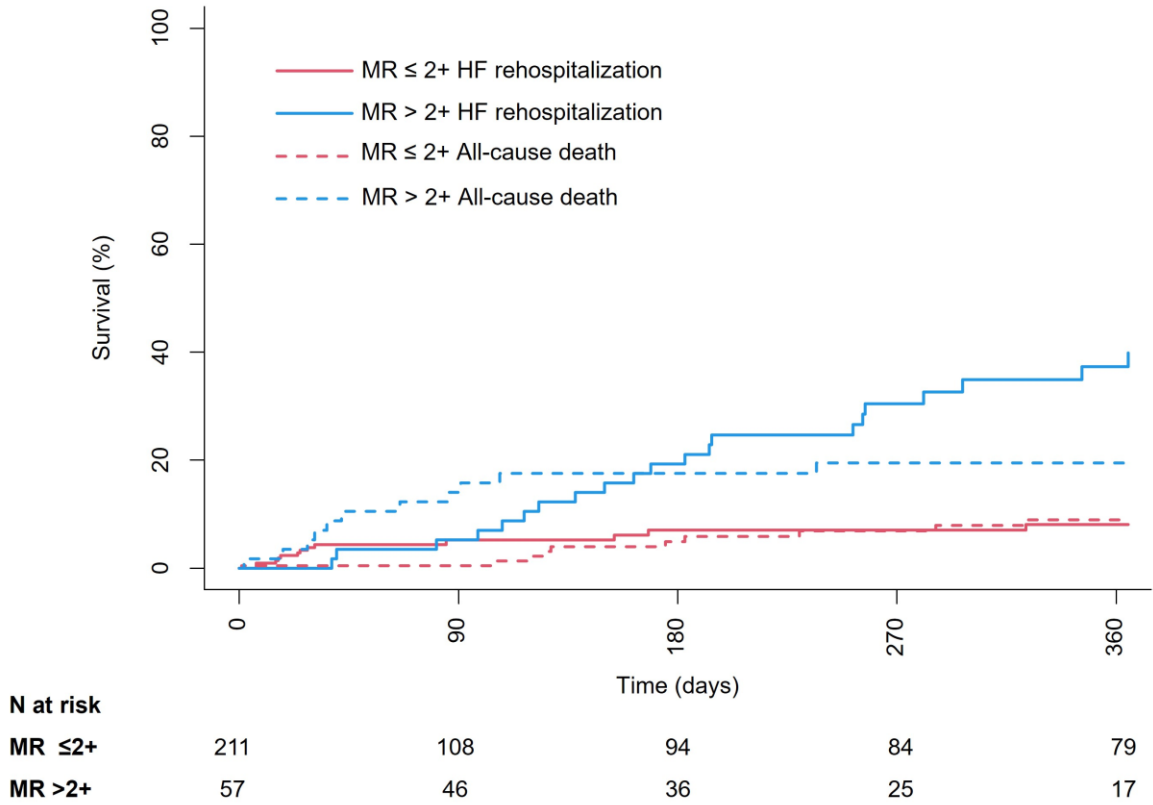

HF, heart failure; MR, mitral regurgitation.
